# Supplementary material
Source: Springer Nature journal article supplement (https://www.springermedizin.de/resource/supplementary/13054_2011_496_MOESM2_ESM.pdf/9708600)
Supplement: MOESM2 [file 9708600]

**Pneumonia patients  
ICD 9 code  
N=1203**

**Excluded  
No pneumonia, no microbiological  
confirmation, VAP,  
pneumectomy  
N= 607**

**Pneumonia patients  
N=596**

**ALI  
N=171**

**No ALI  
N=425**

**ALI within 6h of  
pneumonia onset  
N=53**

**ALI >6h after  
pneumonia onset  
N=118**

**Controls  
N=112**

**Cases  
N=112**
